# Supplementary material for: Electrophoretic Codeposition of MoOx/MoS2 Thin Film for Platinum-Free Counter Electrode in Quantum Dot Solar Cells
Source: Hindawi journal article supplement (doi:10.1155/2021/7691202), 2021-11-09
Supplement: f1 [file 7691202.f1.docx]

**Electrophoretic Co-Deposition of MoOx/MoS2 Thin Film for Platinium Free Counter Electrode in Quantum Dot Solar Cells**

Thanh Tung Nguyena, Huy Phap Ngob,c, Van Thang Leb,d, Le Thanh Nguyen Huynhb,c, Viet Hai Leb,c, Thai Hoang Nguyenb,c,*, Hoang Long Ngoa,*

*a* *NTT Hi-Tech Institute, Nguyen Tat Thanh University, Ho Chi Minh city, Viet Nam*

*b Vietnam National University, Ho Chi Minh Chi City, Vietnam*

*c University of Science, Ho Chi Minh City, Vietnam*

*d Bach Khoa University, Ho Chi Minh City, Vietnam*

Correspondence and proofs to: [nthoang@hcmus.edu.vn](mailto:nthoang@hcmus.edu.vn); longnh@nttu.edu.vn

# Supporting Information

# Structural characterization of MoOx/MoS2 colloidal solution

Nanostructure mixture of molybdenum disulfide and molybdenum oxide (MoOx/MoS2) has been synthesized by a facile and rapid method of microwave. Microwave irradiation can make localized heating that allows higher heating rates and shorter processing time. Diameter of the particles in colloidal solution was measured by laser particle size analyzer LA-960A, and the results are shown in the Figure S1 and Table S1.


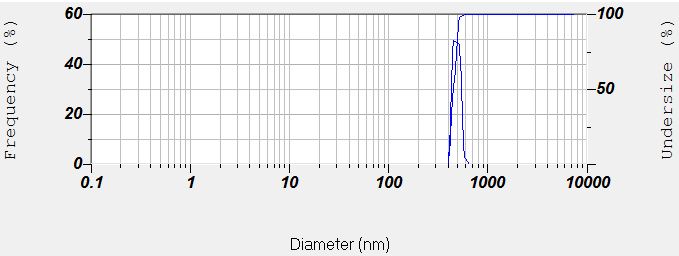


Figure S1 Scheme of particle size distribution, mean is 446.8 nm.

Table S1 Diameter of the MoOx/MoS2 particles

| Order number | 1 | 2 | 3 | 4 | 5 |
| --- | --- | --- | --- | --- | --- |
| Mean (nm) | 446.8 | 457.5 | 434.6 | 461.9 | 466.4 |

Figure S2 XRD pattern of MoS2

MoS2 powder after electrophoresis from MoS2 colloidal solution was analyzed by XRD method. The structure and morphology of MoS2 are characterized by X-ray diffraction (XRD), raman spectroscopy (Raman), scanning electron microscopy (SEM), and transmission electron microscopy (TEM). It is revealed that the products exhibit their poorly crystallinity. As-synthesized MoS2 particles are almost amorphous. The experimental results suggest that the structure of the synthesized samples using microwave heating is randomly oriented, with crystal defects or strains owing to the curvature of the layers.

Figure S2 showed that no peak appeared to match with the peak positions of the crystalline phases. The peaks at the low diffraction angle of less than 200 (which is commonly found in nanomaterials) have not been determined. Therefore, MoS2 particles are amorphous. A study of Yasuhiro Miki concluded that amorphous MoS2 is better than other crystalline phases when used as a cathode in lithium batteries because of its much greater conductivity and significant life cycle of lithium batteries [65].

Table S2 The elemental composition analysis of MoS2 powder.

| Element | Weight % | Atomic % |
| --- | --- | --- |
| O | 39.81 | 73.90 |
| S | 13.03 | 12.07 |
| Mo | 36.42 | 11.27 |


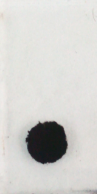

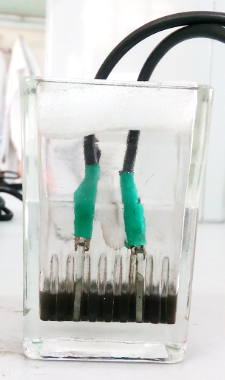

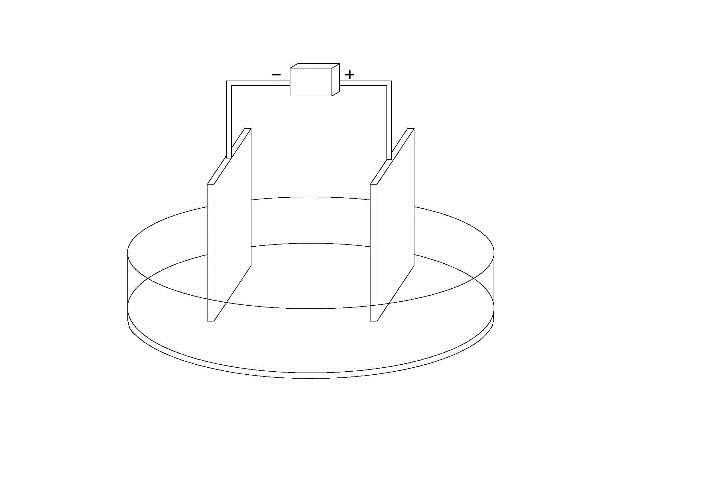


Figure S3 Electrophoretic preparation of MoOx/MoS2 electrode on FTO.

# SILAR method to prepare of electrode FTO/TiO2/CdS/CdSe/ZnS

The pristine FTO/TiO2 film was embedded in the ethanolic solution of Cd2+ (0.100 M) for 5 minutes and washed with ethanol, then embedded in the methanolic solution of S2- (0.100 M) for 5 minutes and washed with methanol. This process was repeated for three times. The electrode FTO/TiO2/CdS was embedded continuously in the ethanolic solution of Cd2+ (0.100 M) for 5 minutes and washed with ethanol, then embedded in the aqueous solution of Se2- (0.300 M) for 5 minutes and washed with water to obtained FTO/TiO2/CdS/CdSe. The electrode was embedded in solution of Zn2+ (0.100 M) for 5 minutes and washed with water, then embedded in solution of S2- (0.100 M) for 5 minutes and washed with water for twice 2 times to obtaine the final QDs electrode FTO/TiO2/CdS/CdSe/ZnS. The QDs electrode was dried at 120 °C for 30 minutes to remove all solvents.


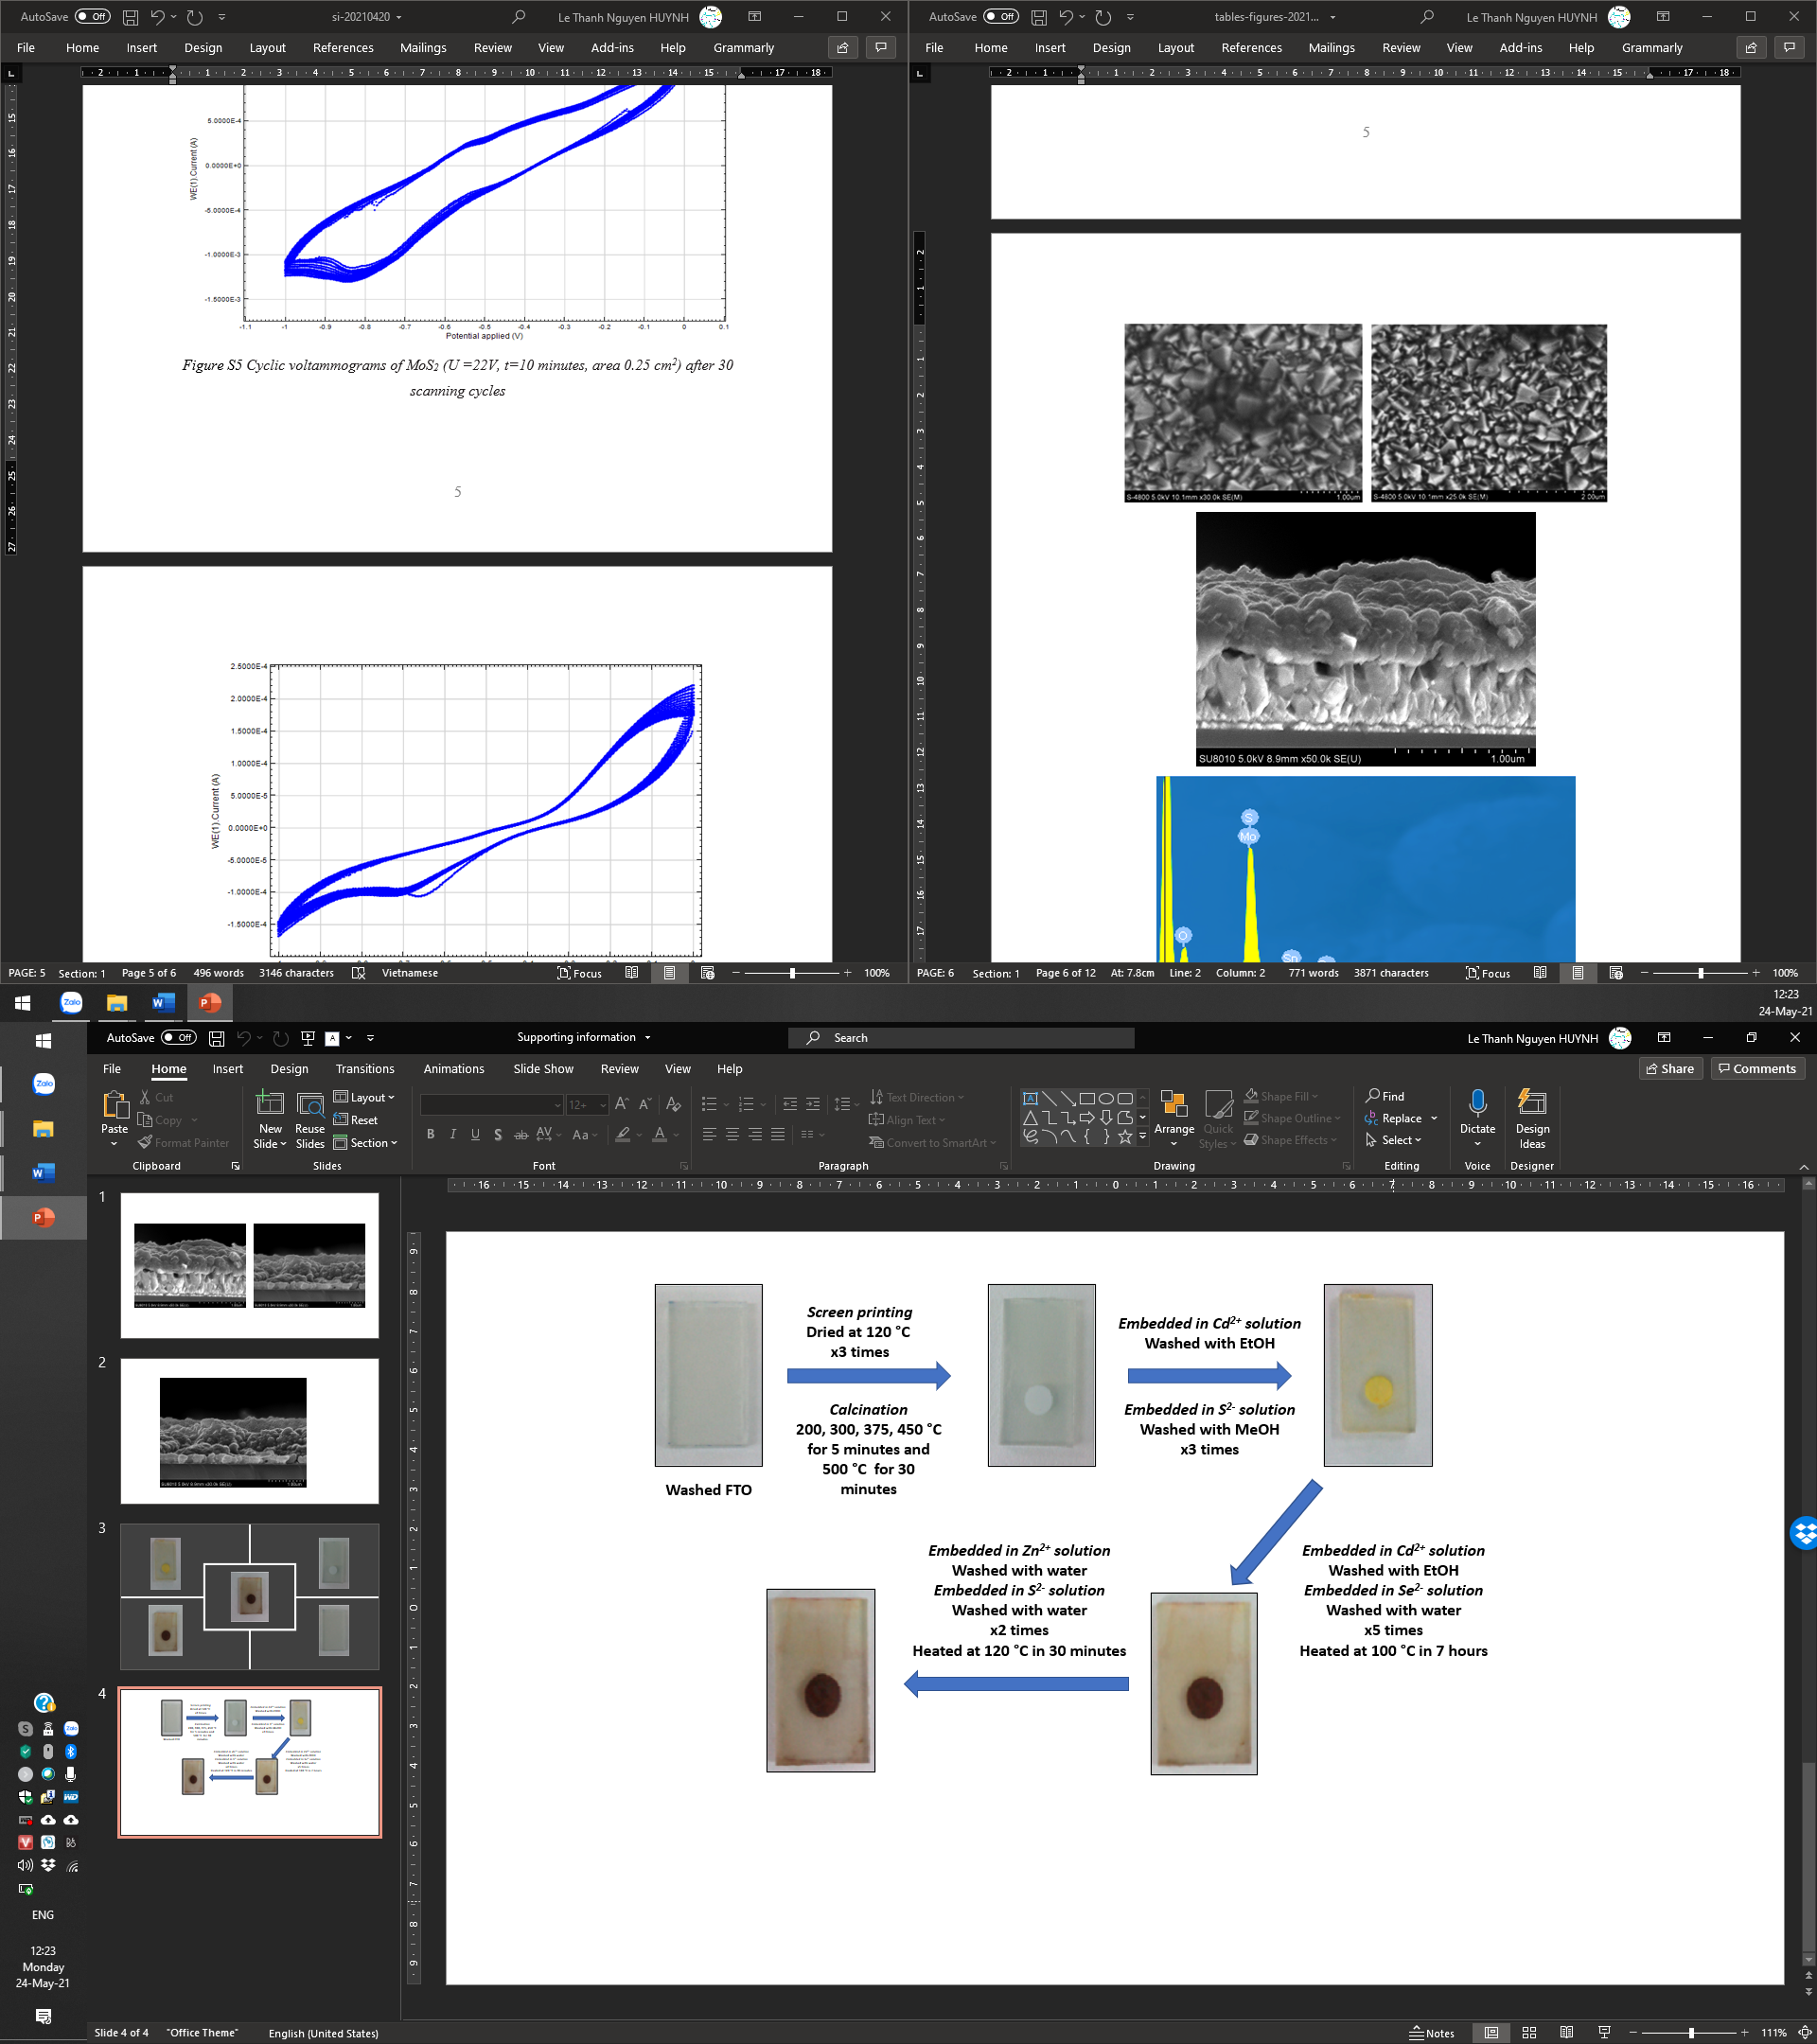


Figure S4 Process of preparation of electrode FTO/TiO2/CdS/CdSe/ZnS by SILAR method.


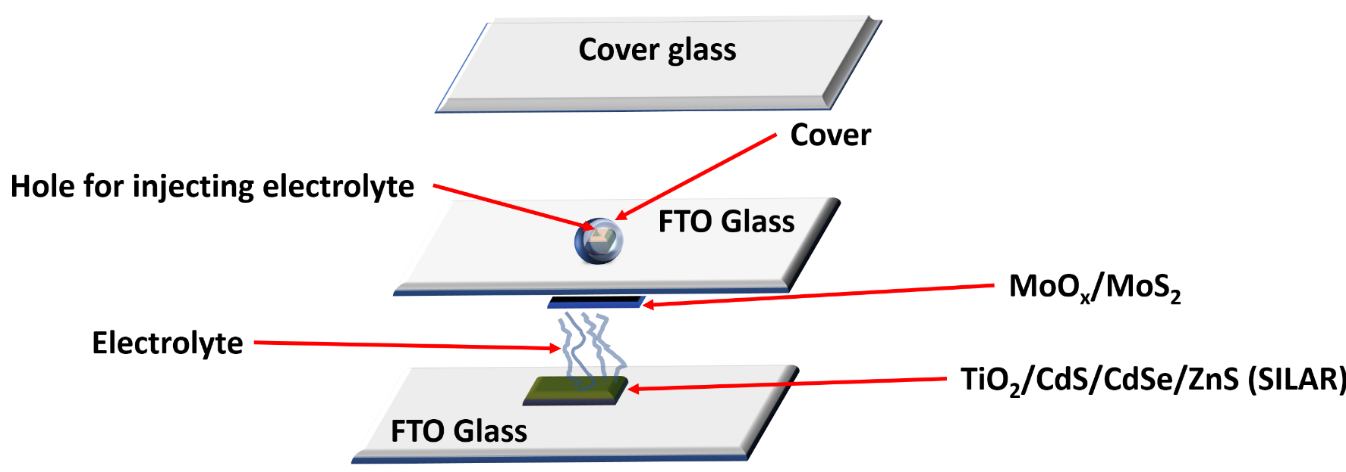


Figure S5 Schematic of the fabricated device.


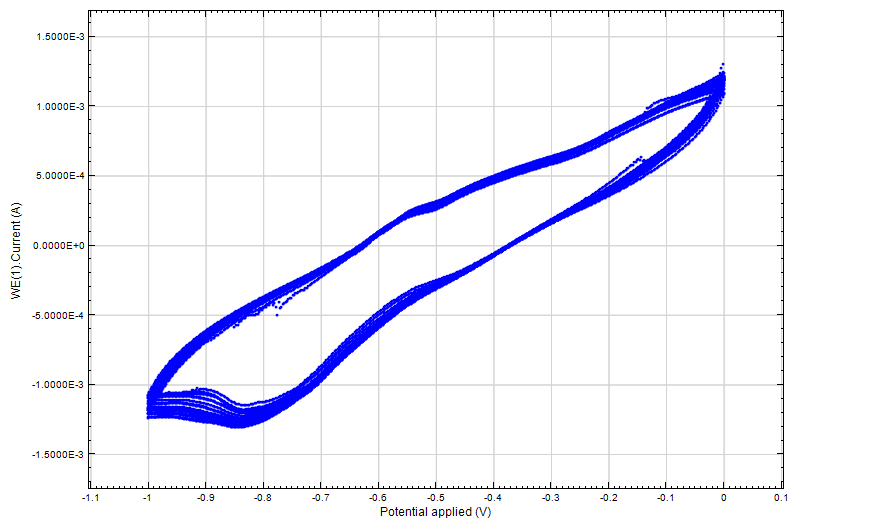


*Figure S6 Cyclic voltammograms of MoS2 (U =25 V, t = 10 minutes, area 0.25 cm2) after 30 scanning cycles*


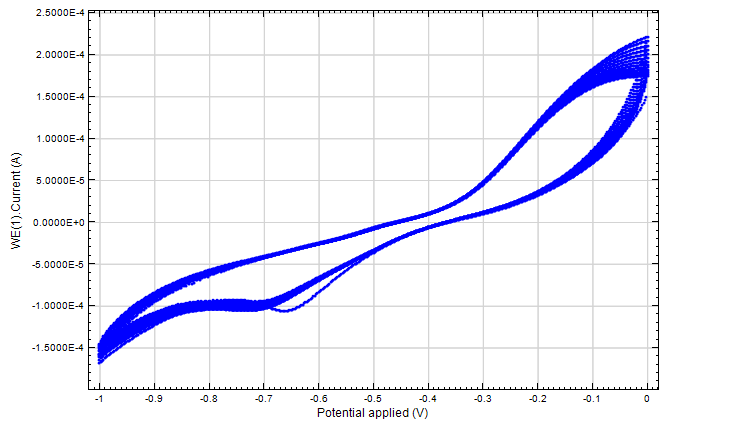


*Figure S7 Cyclic voltammograms of MoS2 (U = 20 V, t = 20 minutes, area 0.25 cm2) after 30 scanning cycles.*
